# Supplementary material for: The PREEMPT study - evaluating smartphone-assisted n-of-1 trials in patients with chronic pain: study protocol for a randomized controlled trial
Source: Springer Nature journal article supplement (doi:10.1186/s13063-015-0590-8), 2015-02-26
Supplement: MOESM1 [file 9781814]

**Additional File 1. ICD9 Codes for chronic pain related diagnoses**

| Dx Codes | Diagnosis Description                                                          | Dx Codes | Diagnosis Description                                |
|----------|--------------------------------------------------------------------------------|----------|------------------------------------------------------|
| 327.52   | Sleep related leg cramps                                                       | 717      | Old bucket handle tear of medial meniscus            |
| 333.84   | Organic writers' cramp                                                         | 717.1    | Derangement of anterior horn of medial meniscus      |
| 338      | Central pain syndrome                                                          | 717.2    | Derangement of posterior horn of medial meniscus     |
| 338.21   | Chronic pain due to trauma                                                     | 717.3    | Other and unspecified derangement of medial meniscus |
| 338.28   | Other chronic postoperative pain                                               | 717.4    | Unspecified derangement of lateral meniscus          |
| 338.29   | Other chronic pain                                                             | 717.41   | Bucket handle tear of lateral meniscus               |
| 338.4    | Chronic pain syndrome                                                          | 717.42   | Derangement of anterior horn of lateral meniscus     |
| 710      | Systemic lupus erythematosus                                                   | 717.43   | Derangement of posterior horn of lateral meniscus    |
| 711.08   | Pyogenic arthritis, other specified sites                                      | 717.49   | Other derangement of lateral meniscus                |
| 712.1    | Chondrocalcinosis due to dicalcium phosphate crystals, unspecified site        | 717.5    | Derangement of meniscus, not elsewhere classified    |
| 712.11   | Chondrocalcinosis due to dicalcium phosphate crystals, shoulder region         | 717.6    | Loose body in knee                                   |
| 712.12   | Chondrocalcinosis due to dicalcium phosphate crystals, upper arm               | 717.7    | Chondromalacia of patella                            |
| 712.13   | Chondrocalcinosis due to dicalcium phosphate crystals, forearm                 | 717.81   | Old disruption of lateral collateral ligament        |
| 712.14   | Chondrocalcinosis due to dicalcium phosphate crystals, hand                    | 717.82   | Old disruption of medial collateral ligament         |
| 712.15   | Chondrocalcinosis due to dicalcium phosphate crystals, pelvic region and thigh | 717.83   | Old disruption of anterior cruciate ligament         |
| 712.16   | Chondrocalcinosis due to dicalcium phosphate crystals, lower leg               | 717.84   | Old disruption of posterior cruciate ligament        |
| 712.17   | Chondrocalcinosis due to dicalcium phosphate crystals, ankle and foot          | 717.85   | Old disruption of other ligament of knee             |
| 712.18   | Chondrocalcinosis due to dicalcium                                             | 717.89   | Other internal derangement of knee                   |

|        |                                                                          |        |                                                       |
|--------|--------------------------------------------------------------------------|--------|-------------------------------------------------------|
|        | phosphate crystals, other specified sites                                |        |                                                       |
| 712.19 | Chondrocalcinosis due to dicalcium phosphate crystals, multiple sites    | 717.9  | Unspecified internal derangement of knee              |
| 712.2  | Chondrocalcinosis due to pyrophosphate crystals, unspecified site        | 718    | Articular cartilage disorder, site unspecified        |
| 712.21 | Chondrocalcinosis due to pyrophosphate crystals, shoulder region         | 718.01 | Articular cartilage disorder, shoulder region         |
| 712.22 | Chondrocalcinosis due to pyrophosphate crystals, upper arm               | 718.02 | Articular cartilage disorder, upper arm               |
| 712.23 | Chondrocalcinosis due to pyrophosphate crystals, forearm                 | 718.03 | Articular cartilage disorder, forearm                 |
| 712.24 | Chondrocalcinosis due to pyrophosphate crystals, hand                    | 718.04 | Articular cartilage disorder, hand                    |
| 712.25 | Chondrocalcinosis due to pyrophosphate crystals, pelvic region and thigh | 718.05 | Articular cartilage disorder, pelvic region and thigh |
| 712.26 | Chondrocalcinosis due to pyrophosphate crystals, lower leg               | 718.07 | Articular cartilage disorder, ankle and foot          |
| 712.27 | Chondrocalcinosis due to pyrophosphate crystals, ankle and foot          | 718.08 | Articular cartilage disorder, other specified site    |
| 712.28 | Chondrocalcinosis due to pyrophosphate crystals, other specified sites   | 718.09 | Articular cartilage disorder, multiple sites          |
| 712.29 | Chondrocalcinosis due to pyrophosphate crystals, multiple sites          | 718.1  | Loose body in joint, site unspecified                 |
| 712.3  | Chondrocalcinosis, cause unspecified, involving unspecified site         | 718.11 | Loose body in shoulder joint                          |
| 712.31 | Chondrocalcinosis, cause unspecified, involving shoulder region          | 718.12 | Loose body in upper arm joint                         |
| 712.32 | Chondrocalcinosis, cause unspecified, involving upper arm                | 718.13 | Loose body in forearm joint                           |
| 712.33 | Chondrocalcinosis, cause unspecified, involving forearm                  | 718.14 | Loose body in hand joint                              |

|        |                                                                         |        |                                                                |
|--------|-------------------------------------------------------------------------|--------|----------------------------------------------------------------|
| 712.34 | Chondrocalcinosis, cause unspecified, involving hand                    | 718.15 | Loose body in pelvic joint                                     |
| 712.35 | Chondrocalcinosis, cause unspecified, involving pelvic region and thigh | 718.17 | Loose body in ankle and foot joint                             |
| 712.36 | Chondrocalcinosis, cause unspecified, involving lower leg               | 718.18 | Loose body in joint of other specified site                    |
| 712.37 | Chondrocalcinosis, cause unspecified, involving ankle and foot          | 718.19 | Loose body in joint of multiple sites                          |
| 712.38 | Chondrocalcinosis, cause unspecified, involving other specified sites   | 719.4  | Pain in joint, site unspecified                                |
| 712.39 | Chondrocalcinosis, cause unspecified, involving multiple sites          | 719.41 | Pain in joint, shoulder region                                 |
| 712.8  | Other specified crystal arthropathies, site unspecified                 | 719.42 | Pain in joint, upper arm                                       |
| 712.81 | Other specified crystal arthropathies, shoulder region                  | 719.43 | Pain in joint, forearm                                         |
| 712.82 | Other specified crystal arthropathies, upper arm                        | 719.44 | Pain in joint, hand                                            |
| 712.83 | Other specified crystal arthropathies, forearm                          | 719.45 | Pain in joint, pelvic region and thigh                         |
| 712.84 | Other specified crystal arthropathies, hand                             | 719.46 | Pain in joint, lower leg                                       |
| 712.85 | Other specified crystal arthropathies, pelvic region and thigh          | 719.47 | Pain in joint, ankle and foot                                  |
| 712.86 | Other specified crystal arthropathies, lower leg                        | 719.48 | Pain in joint, other specified sites                           |
| 712.87 | Other specified crystal arthropathies, ankle and foot                   | 719.49 | Pain in joint, multiple sites                                  |
| 712.88 | Other specified crystal arthropathies, other specified sites            | 719.5  | Stiffness of joint, not elsewhere classified, unspecified site |
| 712.89 | Other specified crystal arthropathies, multiple sites                   | 719.51 | Stiffness of joint, not elsewhere classified, shoulder region  |
| 712.9  | Unspecified crystal arthropathy, site unspecified                       | 719.52 | Stiffness of joint, not elsewhere classified, upper arm        |
| 712.91 | Unspecified crystal arthropathy, shoulder region                        | 719.53 | Stiffness of joint, not elsewhere classified, forearm          |

|        |                                                           |        |                                                                       |
|--------|-----------------------------------------------------------|--------|-----------------------------------------------------------------------|
| 712.92 | Unspecified crystal arthropathy, upper arm                | 719.54 | Stiffness of joint, not elsewhere classified, hand                    |
| 712.93 | Unspecified crystal arthropathy, forearm                  | 719.55 | Stiffness of joint, not elsewhere classified, pelvic region and thigh |
| 712.94 | Unspecified crystal arthropathy, hand                     | 719.56 | Stiffness of joint, not elsewhere classified, lower leg               |
| 712.95 | Unspecified crystal arthropathy, pelvic region and thigh  | 719.57 | Stiffness of joint, not elsewhere classified, ankle and foot          |
| 712.96 | Unspecified crystal arthropathy, lower leg                | 719.58 | Stiffness of joint, not elsewhere classified, other specified site    |
| 712.97 | Unspecified crystal arthropathy, ankle and foot           | 719.59 | Stiffness of joints, not elsewhere classified, multiple sites         |
| 712.98 | Unspecified crystal arthropathy, other specified sites    | 721    | Cervical spondylosis without myelopathy                               |
| 712.99 | Unspecified crystal arthropathy, multiple sites           | 721.3  | Lumbosacral spondylosis without myelopathy                            |
| 714    | Rheumatoid arthritis                                      | 721.7  | Traumatic spondylopathy                                               |
| 714.89 | Other specified inflammatory polyarthropathies            | 721.8  | Other allied disorders of spine                                       |
| 715    | Generalized osteoarthritis, unspecified site              | 721.9  | Spondylosis of unspecified site without mention of myelopathy         |
| 715.04 | Generalized osteoarthritis, involving hand                | 722.4  | Degeneration of cervical intervertebral disc                          |
| 715.09 | Generalized osteoarthritis, involving multiple sites      | 722.51 | Degeneration of thoracic or thoracolumbar intervertebral disc         |
| 715.1  | Primary localized osteoarthritis, specified site          | 722.52 | Degeneration of lumbar or lumbosacral intervertebral disc             |
| 715.11 | Primary localized osteoarthritis, shoulder region         | 722.6  | Degeneration of intervertebral disc, site unspecified                 |
| 715.12 | Primary localized osteoarthritis, upper arm               | 722.8  | Postlaminectomy syndrome, unspecified region                          |
| 715.13 | Primary localized osteoarthritis, forearm                 | 722.81 | Postlaminectomy syndrome, cervical region                             |
| 715.14 | Primary localized osteoarthritis, hand                    | 722.82 | Postlaminectomy syndrome, thoracic region                             |
| 715.15 | Primary localized osteoarthritis, pelvic region and thigh | 722.83 | Postlaminectomy syndrome, lumbar region                               |
| 715.16 | Primary localized osteoarthritis,                         | 723    | Spinal stenosis in cervical region                                    |

|        |                                                                                       |        |                                                                 |
|--------|---------------------------------------------------------------------------------------|--------|-----------------------------------------------------------------|
|        | lower leg                                                                             |        |                                                                 |
| 715.17 | Primary localized osteoarthritis, ankle and foot                                      | 723.1  | Cervicalgia                                                     |
| 715.18 | Primary localized osteoarthritis, other specified sites                               | 723.2  | Cervicocranial syndrome                                         |
| 715.2  | Secondary localized osteoarthritis, unspecified site                                  | 723.3  | Cervicobrachial syndrome (diffuse)                              |
| 715.21 | Secondary localized osteoarthritis, shoulder region                                   | 723.4  | Brachial neuritis or radiculitis nos                            |
| 715.22 | Secondary localized osteoarthritis, upper arm                                         | 724    | Spinal stenosis, unspecified region other than cervical         |
| 715.23 | Secondary localized osteoarthritis, forearm                                           | 724.01 | Spinal stenosis of thoracic region                              |
| 715.24 | Secondary localized osteoarthritis, involving hand                                    | 724.02 | Spinal stenosis, lumbar region, without neurogenic claudication |
| 715.25 | Secondary localized osteoarthritis, pelvic region and thigh                           | 724.03 | Spinal stenosis, lumbar region, with neurogenic claudication    |
| 715.26 | Secondary localized osteoarthritis, lower leg                                         | 724.09 | Spinal stenosis, other region other than cervical               |
| 715.27 | Secondary localized osteoarthritis, ankle and foot                                    | 724.1  | Pain in thoracic spine                                          |
| 715.28 | Secondary localized osteoarthritis, other specified site                              | 724.2  | Lumbago                                                         |
| 715.3  | Localized osteoarthritis not specified whether primary or secondary, unspecified site | 724.3  | Sciatica                                                        |
| 715.31 | Localized osteoarthritis not specified whether primary or secondary, shoulder region  | 724.4  | Thoracic or lumbosacral neuritis or radiculitis, unspecified    |
| 715.32 | Localized osteoarthritis not specified whether primary or secondary, upper arm        | 724.5  | Unspecified backache                                            |
| 715.33 | Localized osteoarthritis not specified whether primary or secondary, forearm          | 726.1  | Unspecified disorders of bursae and tendons in shoulder region  |
| 715.34 | Localized osteoarthritis not specified whether primary or secondary, hand             | 726.11 | Calcifying tendinitis of shoulder                               |
| 715.35 | Localized osteoarthritis not specified whether primary or secondary, pelvic           | 726.12 | Bicipital tenosynovitis                                         |

|        |                                                                                                 |        |                                                              |
|--------|-------------------------------------------------------------------------------------------------|--------|--------------------------------------------------------------|
|        | region and thigh                                                                                |        |                                                              |
| 715.36 | Localized osteoarthritis not specified whether primary or secondary, lower leg                  | 726.31 | Medial epicondylitis of elbow                                |
| 715.37 | Localized osteoarthritis not specified whether primary or secondary, ankle and foot             | 726.32 | Lateral epicondylitis of elbow                               |
| 715.38 | Localized osteoarthritis not specified whether primary or secondary, other specified sites      | 726.33 | Olecranon bursitis                                           |
| 715.8  | Osteoarthritis involving more than one site, but not specified as generalized, unspecified site | 726.39 | Other enthesopathy of elbow region                           |
| 715.89 | Osteoarthritis involving multiple sites, but not specified as generalized                       | 726.61 | Pes anserinus tendinitis or bursitis                         |
| 715.9  | Osteoarthritis, unspecified whether generalized or localized, unspecified site                  | 726.62 | Tibial collateral ligament bursitis                          |
| 715.91 | Osteoarthritis, unspecified whether generalized or localized, shoulder region                   | 726.63 | Fibular collateral ligament bursitis                         |
| 715.92 | Osteoarthritis, unspecified whether generalized or localized, upper arm                         | 726.64 | Patellar tendinitis                                          |
| 715.93 | Osteoarthritis, unspecified whether generalized or localized, forearm                           | 726.65 | Prepatellar bursitis                                         |
| 715.94 | Osteoarthritis, unspecified whether generalized or localized, hand                              | 726.71 | Achilles bursitis or tendinitis                              |
| 715.95 | Osteoarthritis, unspecified whether generalized or localized, pelvic region and thigh           | 726.72 | Tibialis tendinitis                                          |
| 715.96 | Osteoarthritis, unspecified whether generalized or localized, lower leg                         | 727    | Unspecified synovitis and tenosynovitis                      |
| 715.97 | Osteoarthritis, unspecified whether generalized or localized, ankle and foot                    | 727.01 | Synovitis and tenosynovitis in diseases classified elsewhere |
| 715.98 | Osteoarthritis, unspecified whether generalized or localized, other specified sites             | 727.04 | Radial styloid tenosynovitis                                 |
| 716.1  | Traumatic arthropathy, site unspecified                                                         | 727.05 | Other tenosynovitis of hand and wrist                        |

|        |                                                                       |        |                                                      |
|--------|-----------------------------------------------------------------------|--------|------------------------------------------------------|
| 716.11 | Traumatic arthropathy, shoulder region                                | 727.06 | Tenosynovitis of foot and ankle                      |
| 716.12 | Traumatic arthropathy, upper arm                                      | 727.09 | Other synovitis and tenosynovitis                    |
| 716.13 | Traumatic arthropathy, forearm                                        | 727.2  | Specific bursitides often of occupational origin     |
| 716.14 | Traumatic arthropathy, hand                                           | 727.3  | Other bursitis disorders                             |
| 716.15 | Traumatic arthropathy, pelvic region and thigh                        | 727.81 | Contracture of tendon (sheath)                       |
| 716.16 | Traumatic arthropathy, lower leg                                      | 728.85 | Spasm of muscle                                      |
| 716.17 | Traumatic arthropathy, ankle and foot                                 | 728.89 | Other disorder of muscle, ligament, and fascia       |
| 716.18 | Traumatic arthropathy, other specified sites                          | 728.9  | Unspecified disorder of muscle, ligament, and fascia |
| 716.19 | Traumatic arthropathy, multiple sites                                 | 729.1  | Unspecified myalgia and myositis                     |
| 716.49 | Transient arthropathy, multiple sites                                 | 729.2  | Unspecified neuralgia, neuritis, and radiculitis     |
| 716.5  | Unspecified polyarthropathy or polyarthritis, site unspecified        | 729.3  | Panniculitis, unspecified site                       |
| 716.51 | Unspecified polyarthropathy or polyarthritis, shoulder region         | 729.39 | Panniculitis of other sites                          |
| 716.52 | Unspecified polyarthropathy or polyarthritis, upper arm               | 729.5  | Pain in soft tissues of limb                         |
| 716.53 | Unspecified polyarthropathy or polyarthritis, forearm                 | 729.82 | Cramp of limb                                        |
| 716.54 | Unspecified polyarthropathy or polyarthritis, hand                    | 729.89 | Other musculoskeletal symptoms referable to limbs    |
| 716.55 | Unspecified polyarthropathy or polyarthritis, pelvic region and thigh | 780.96 | Generalized pain                                     |
| 716.56 | Unspecified polyarthropathy or polyarthritis, lower leg               | 784.92 | Jaw pain                                             |
| 716.57 | Unspecified polyarthropathy or polyarthritis, ankle and foot          | 786.5  | Unspecified chest pain                               |
| 716.58 | Unspecified polyarthropathy or polyarthritis, other specified sites   | 786.51 | Precordial pain                                      |
| 716.59 | Unspecified polyarthropathy or polyarthritis, multiple sites          | 786.52 | Painful respiration                                  |
