# Supplementary material for: The PREEMPT study - evaluating smartphone-assisted n-of-1 trials in patients with chronic pain: study protocol for a randomized controlled trial
Source: Springer Nature journal article supplement (doi:10.1186/s13063-015-0590-8), 2015-02-26

**Additional File 3.** Trialist graphs available at the Result Review Session

**Comparison of Treatments**

**Any NSAID (e.g., ibuprofen, naproxen, sulindac)**

**Tylenol (acetaminophen)**

**Pain Intensity Chronology**

(Zero is no pain)

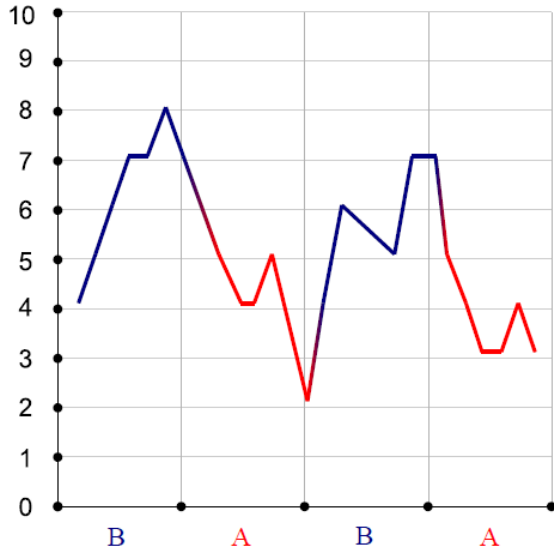

**Pain Intensity by Treatment**

(Zero is no pain)

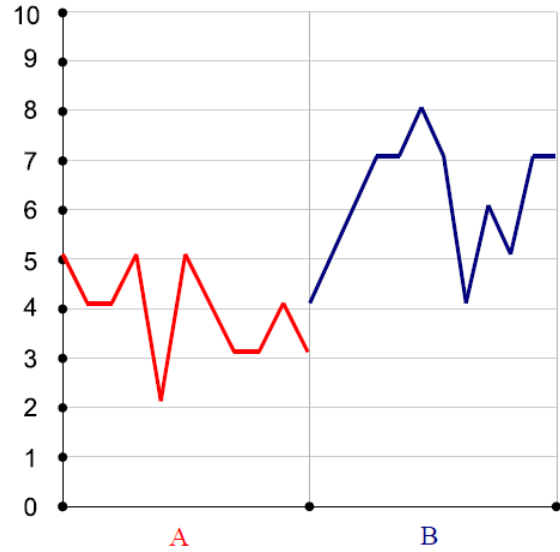

**Pain Intensity Average**

(Zero is no pain)

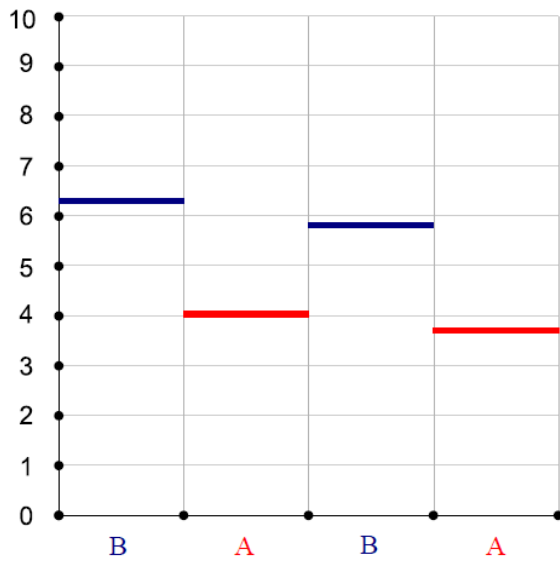

**Averaged Secondary Outcomes**

(Shorter bar is better outcome)

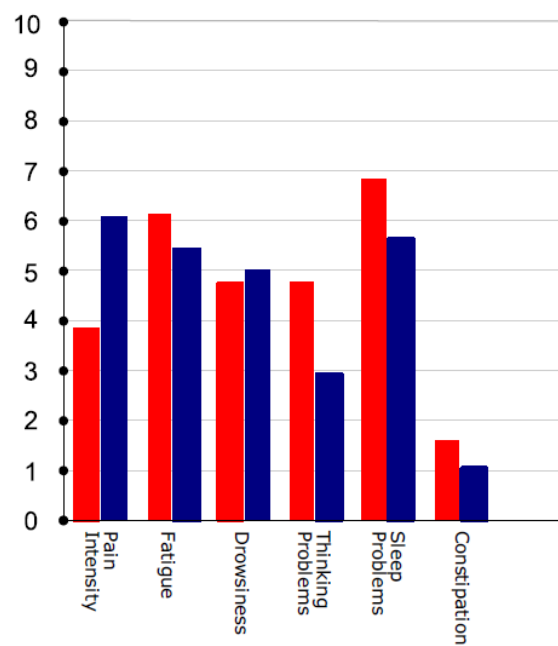

### Estimated Difference Between Treatments (Bars Represent Margins of Error)

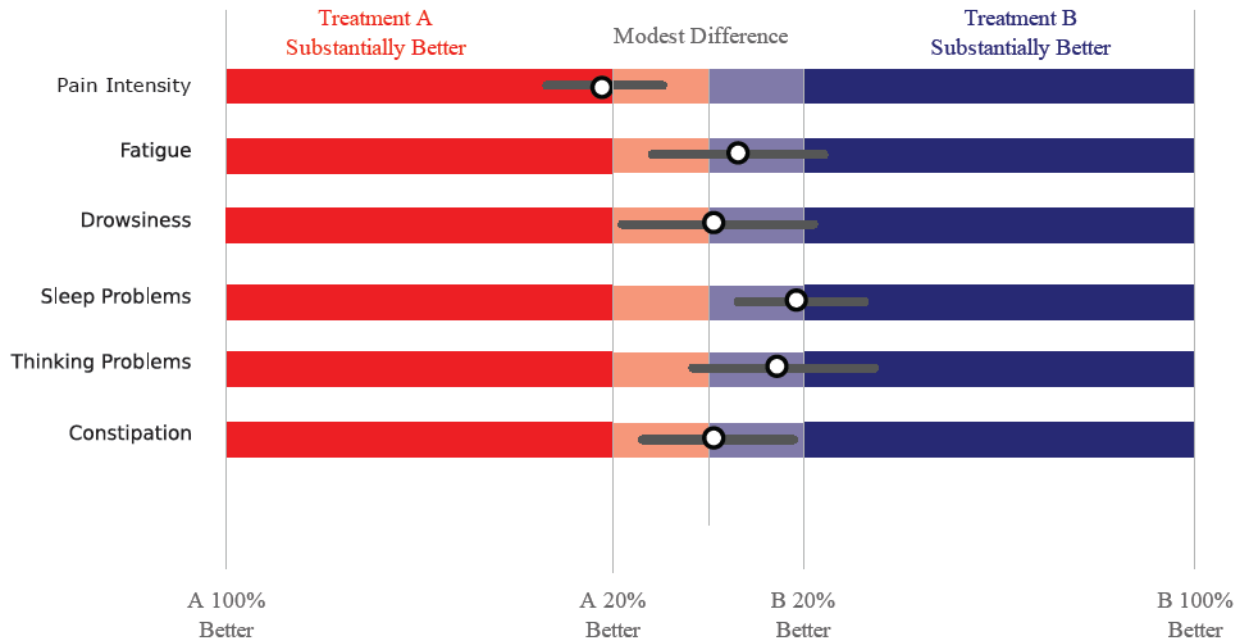

### Likelihood That One Treatment is Better Than the Other

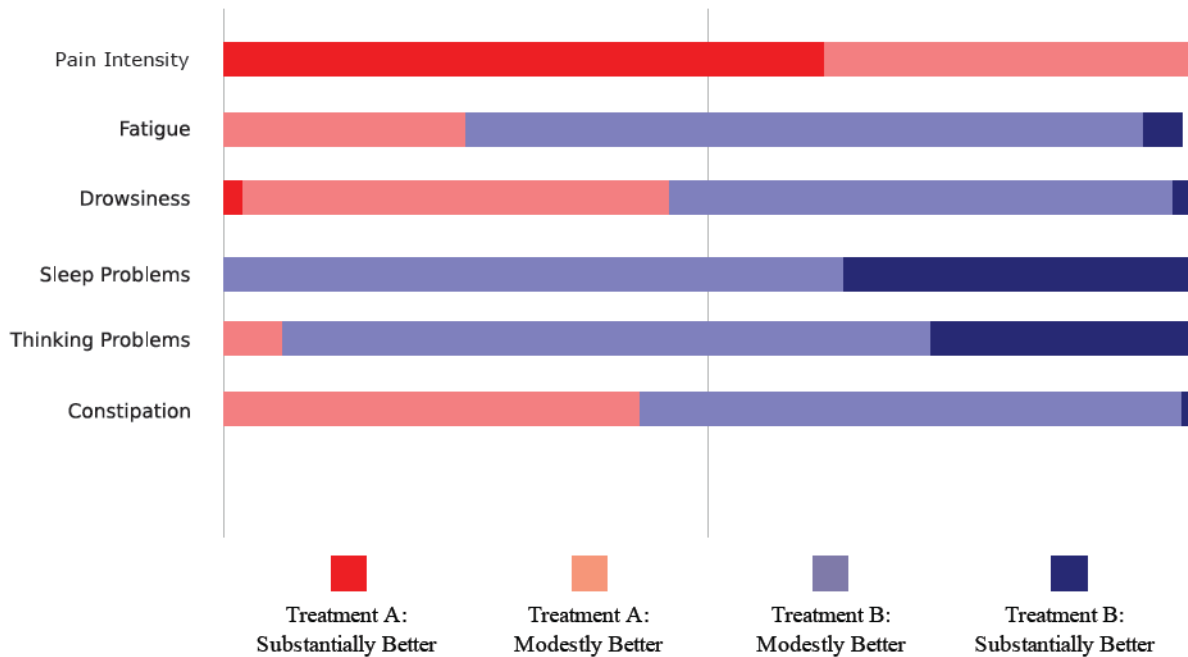

Supplement: MOESM3 [file 9781814]
